# Supplementary material for: A facile one-step method to produce MoS2quantum dots as promising bio-imaging materials
Source: Royal Society of Chemistry journal article supplement (doi:10.1039/c6ra00572a), 2016-01-01
Supplement: c6ra00572a1.pdf [file c6ra00572a1.pdf]

Electronic Supporting Information

**A facile one-step method to produce MoS<sub>2</sub> quantum dots as promising  
bio-imaging materials**

Qingqing Liu,<sup>a</sup> Chaofan Hu,<sup>b</sup> Xiaomin Wang\*<sup>a</sup>

<sup>a</sup> College of Materials Science and Engineering, Taiyuan University of Technology, Taiyuan  
030024, China. E-mail: wangxiaomin@tyut.edu.cn

<sup>b</sup> College of Mechanics, Taiyuan University of Technology, Taiyuan 030024, China

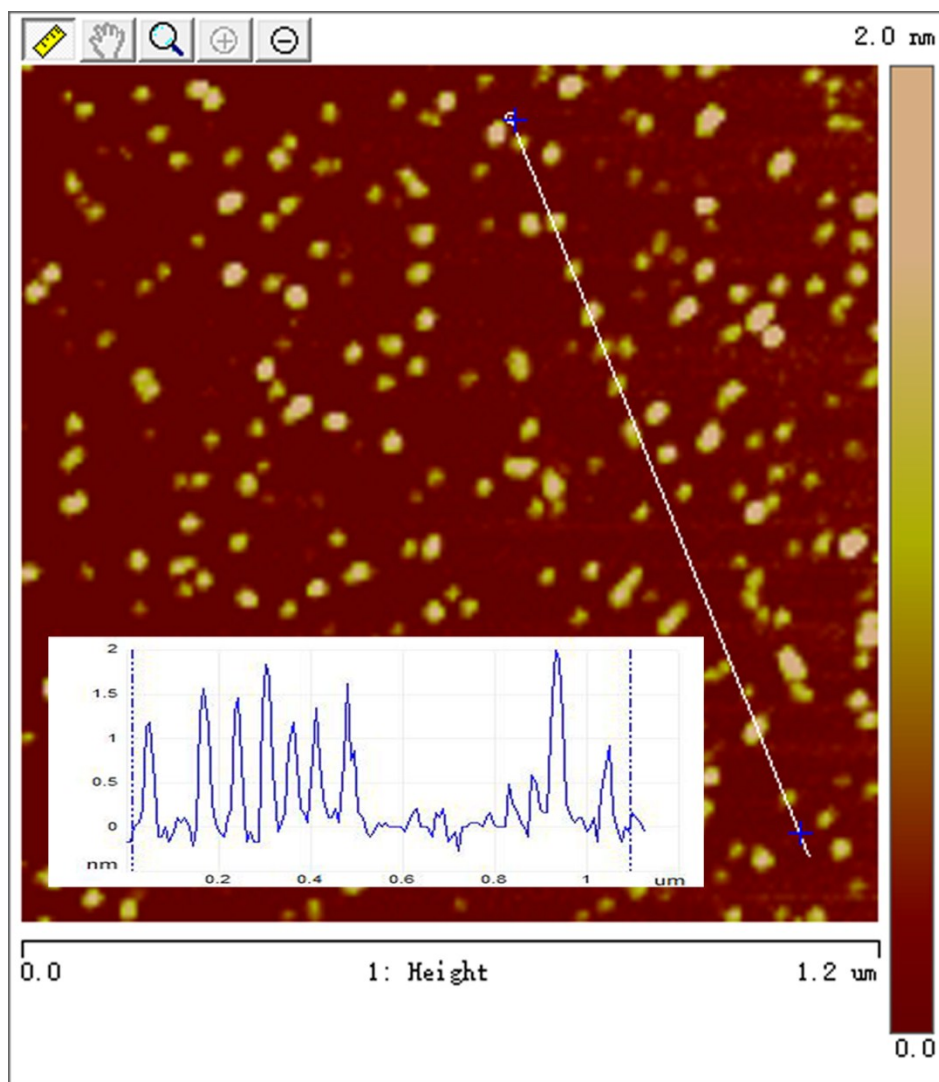

Fig. S1 AFM image of the MoS<sub>2</sub> QDs. Inset: height profile along the white line corresponding to the AFM image.

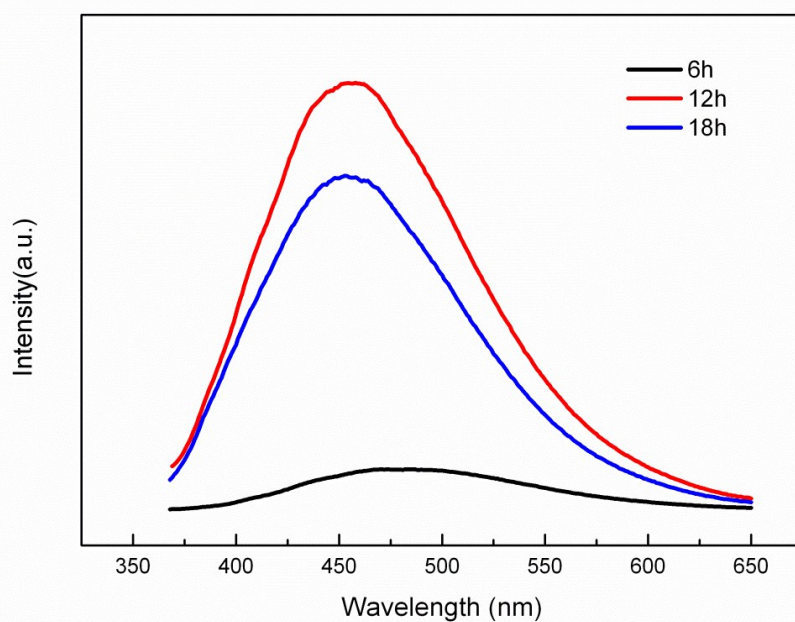

Fig. S2 Comparison of the PL spectra of MoS<sub>2</sub> QDs prepared at different reaction time using the excitation wavelength of 360 nm (The reaction temperature was 180 °C, the amount of NaOH was 45 mg).

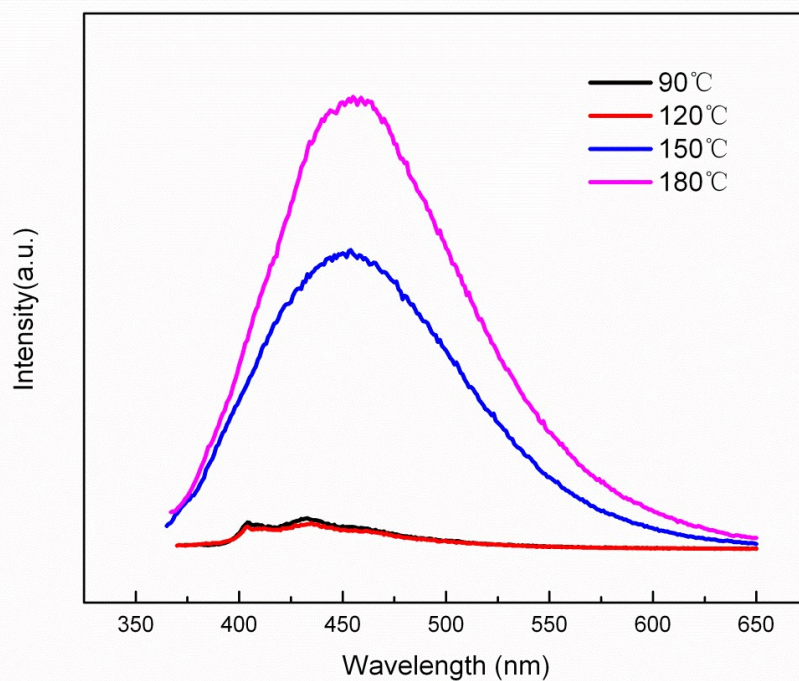

Fig. S3 Comparison of PL spectra of MoS<sub>2</sub> QDs prepared at different temperatures using the excitation wavelength of 360 nm (The reaction time was 12 h, the amount of NaOH was 45 mg).

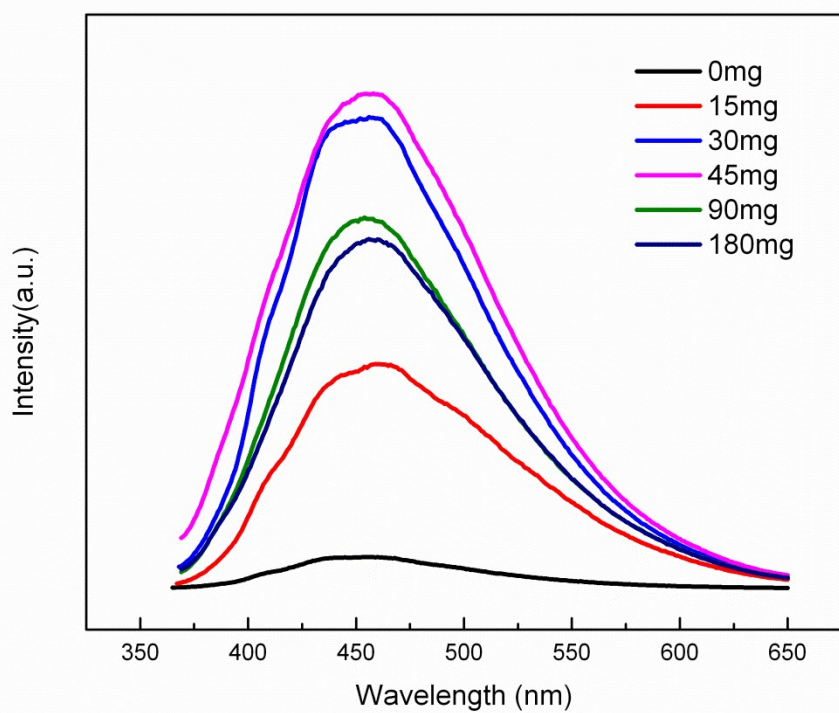

Fig. S4 Comparison of PL spectra of MoS<sub>2</sub> QDs prepared with the addition of different amount of NaOH using the excitation wavelength of 360 nm (The reaction temperature was 180 °C, the reaction time was 12 h).
